# Supplementary material for: Physiological and genomic features of highly alkaliphilic hydrogen-utilizing Betaproteobacteria from a continental serpentinizing site
Source: PubMed Central journal article supplement — Nat Commun. 2014 May 21;5:3900. doi: 10.1038/ncomms4900 (PMC4050266; doi:10.1038/ncomms4900), 2014-05-21
Supplement: ncomms4900-s1.pdf [file ncomms4900-s1.pdf]

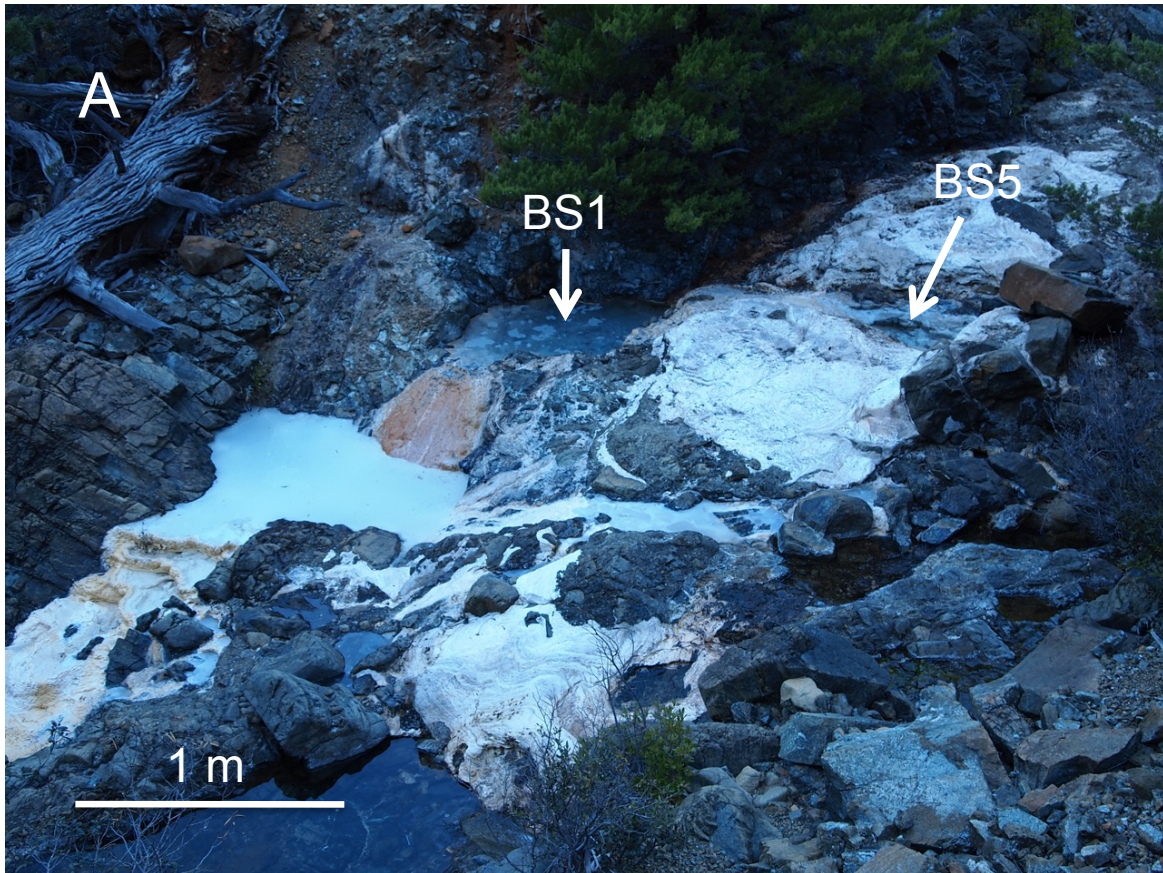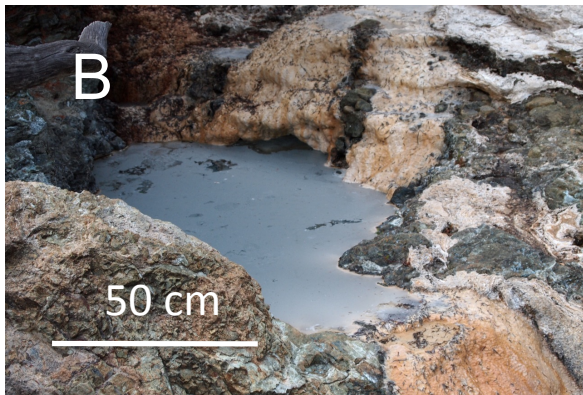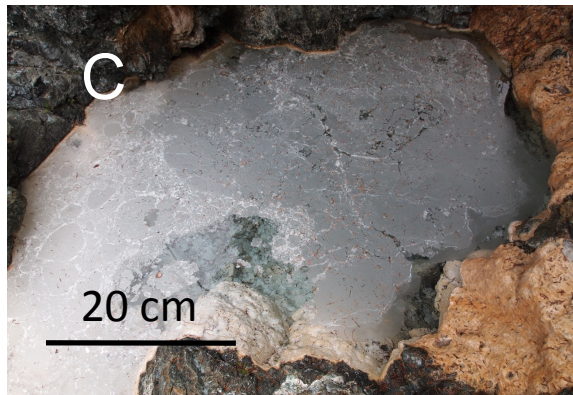

Supplementary Figure 1: Spring fluid was collected at Barnes springs (BS) for the microbial isolation.  
A; BS complex, B; BS1 and C; BS5. The surface of springs is covered with calcite skin. Due to the gas bubbling from the bottom, part of the calcite at the surface was broken in both springs.

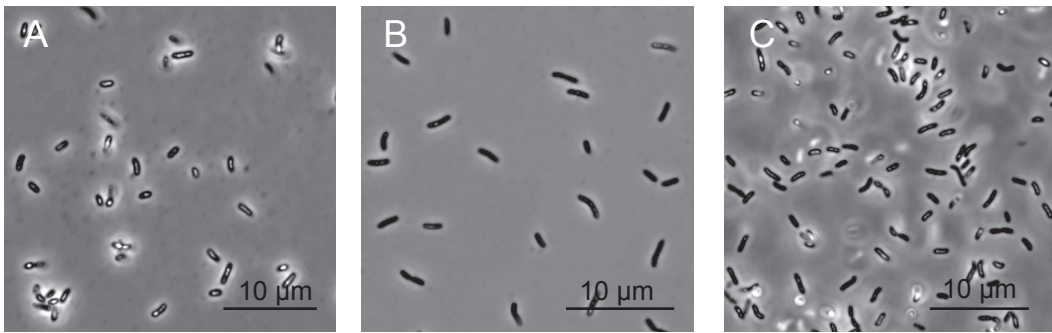

Supplementary Figure 2 Phase contrast images of isolated strains A) A1, B) B1 and C) H1

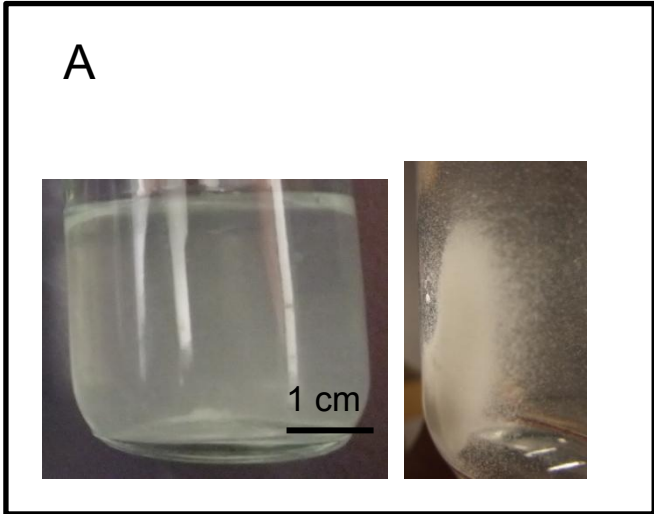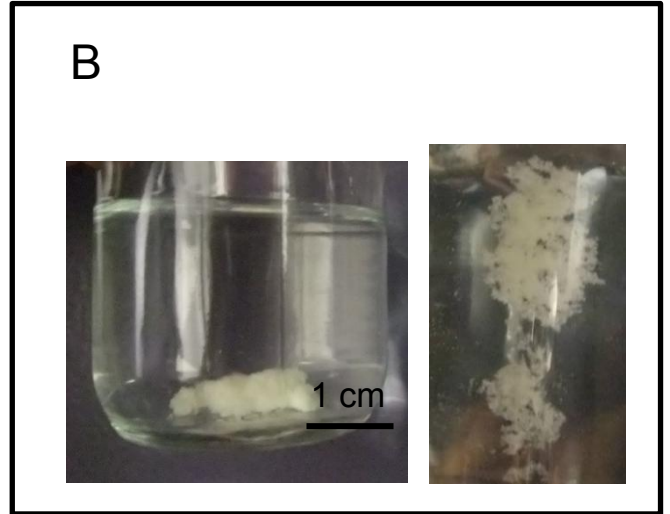

Supplementary Figure 3 Two-week cultivation of strain A1 in the liquid medium  
A) no cell control, B) strain A1



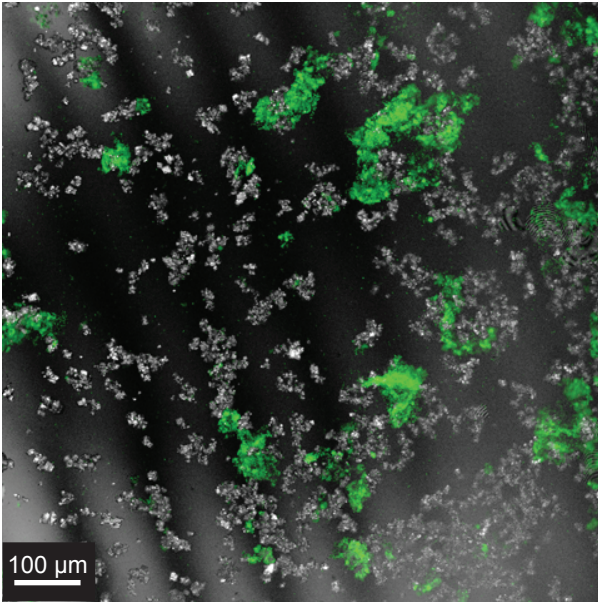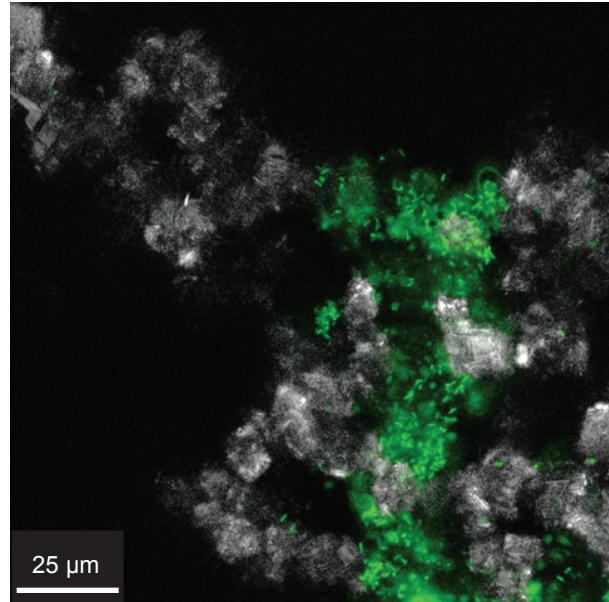

Supplementary Figure 4 Confocal microscopic observations of the cell aggregates on calcium carbonate with different magnifications. Strain A1 was grown autotrophically for three days. Cells were stained with SYBR Green I (Green). Calcium carbonate precipitate was also observed (White).

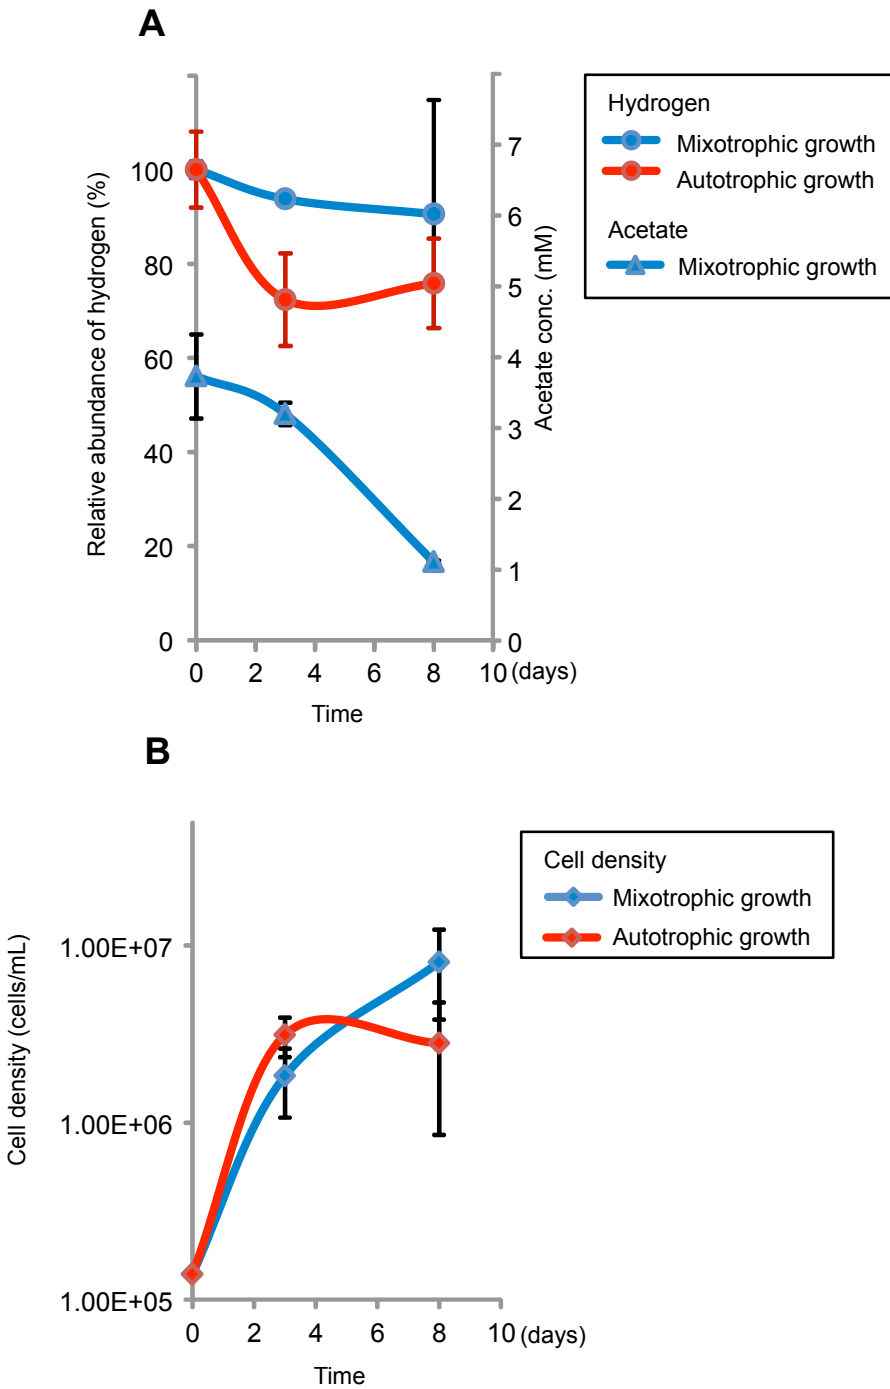

Supplementary Figure 5; Growth curves of strain A1 (n=3). A) Acetate (triangle) and hydrogen (circle) consumption and B) cell densities (triangle). Samples were collected at 0, 3 and 8 days after cell inoculation. To count cell numbers, the samples were shaken vigorously. Thus the cells were detached from calcite and the autotrophic growth for strain A1 was stopped. Bars indicate standard deviation.

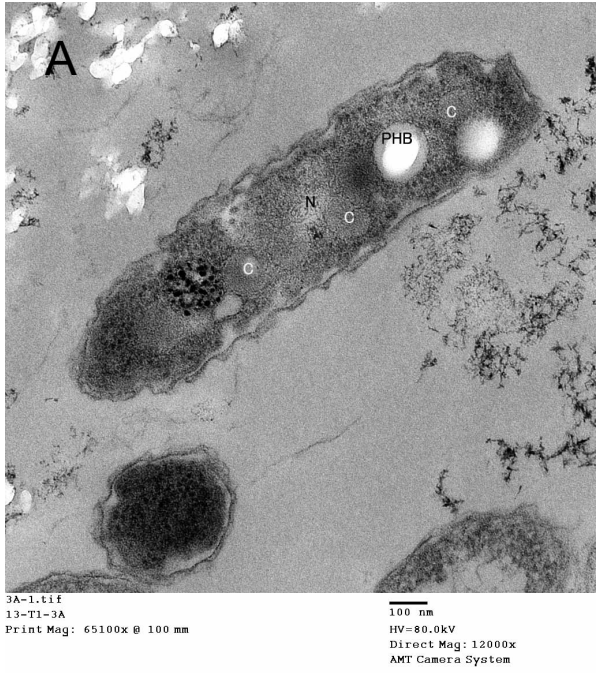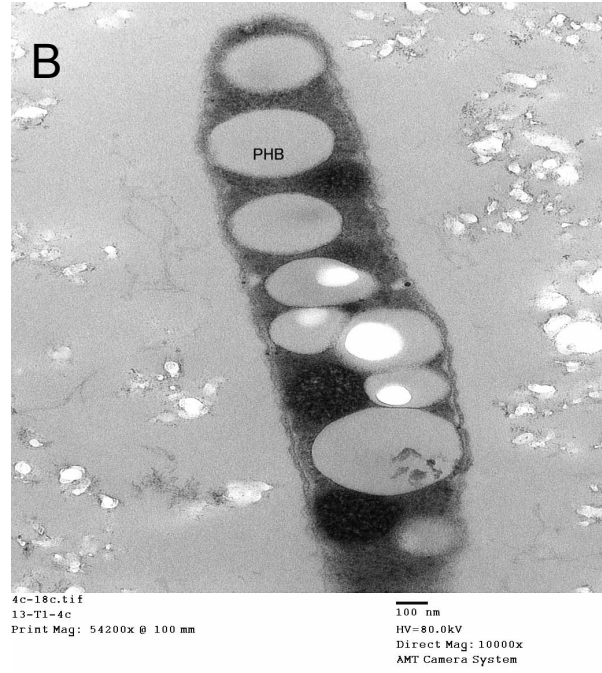

Supplementary Figure 6 Thin-section TEM observations of strain A1. The cells were fixed after five-days cultivations. A) Autotrophic growth, B) Heterotrophic growth. C; Carboxysome, N; Nucleoid, PHB; Polyhydroxybutyrate

# A

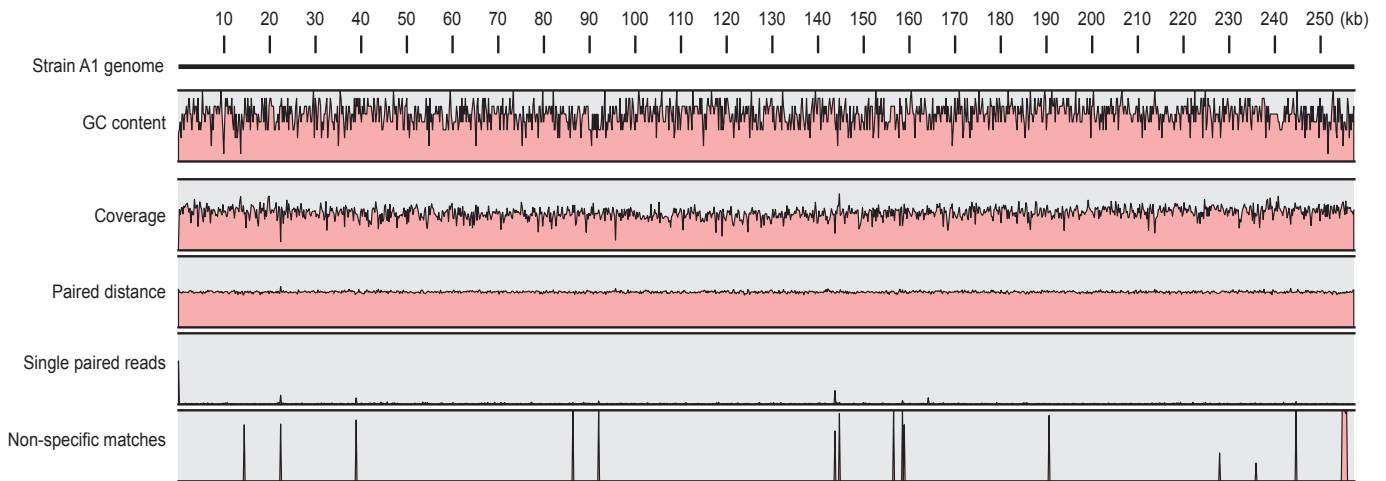

# B

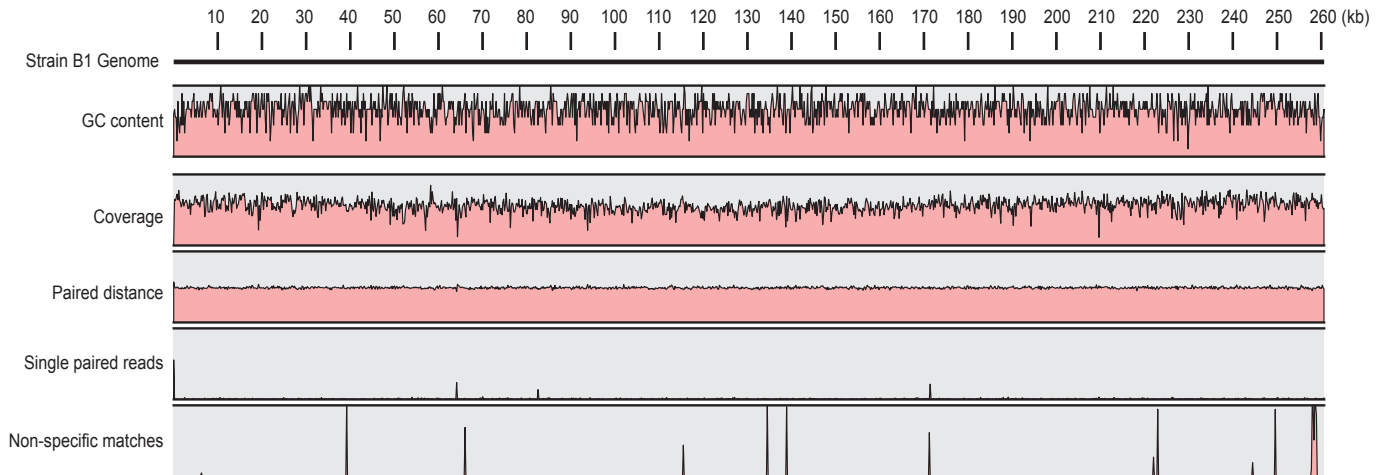

Supplementary Figure 7 Raw reads mapping to the gap-closed genome sequences of strain A1 (A) and B1 (B)

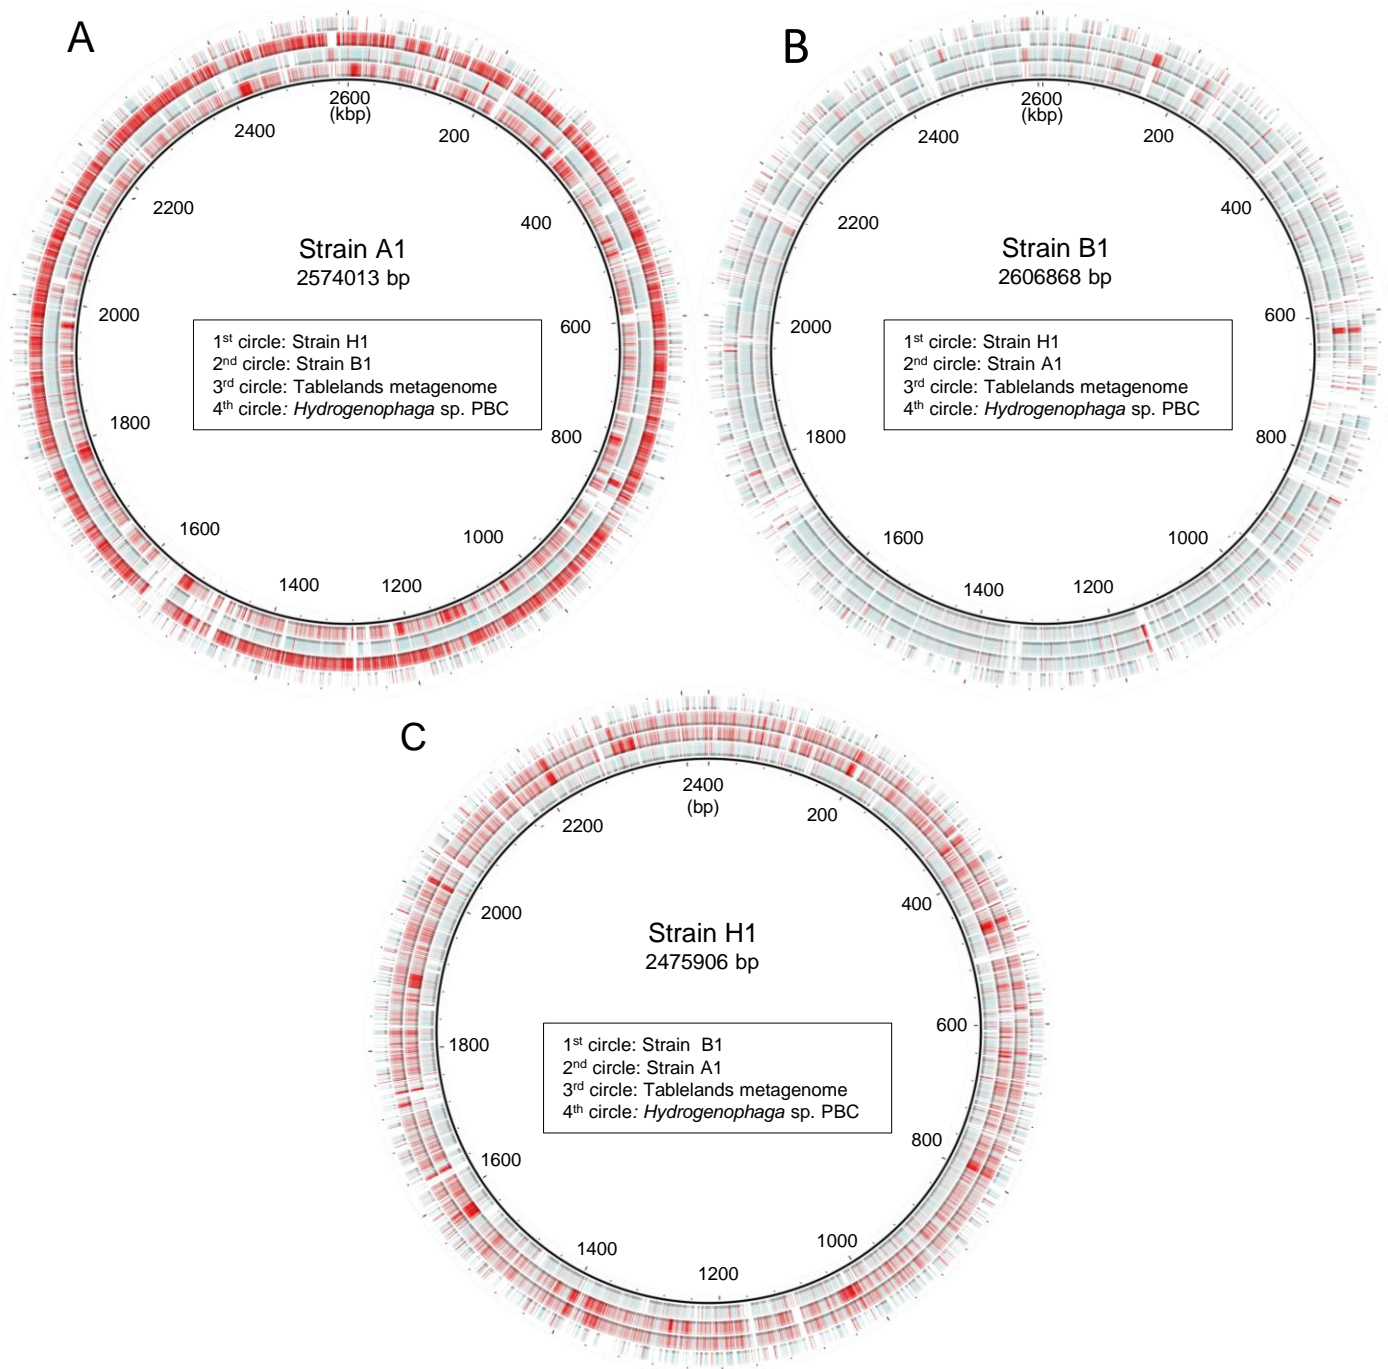

Supplementary Figure 8 Genome-wide comparisons of strain A1 (A), B1 (B) and H1 (C). The inner scales designate the coordinates (in kbp). The first to fourth circles show the blastn analysis of strains A1, B1 and H1 against each genome or metagenome as indicated in the figure. The lower (gray) and upper (red) identity threshold in the blastn analysis is >90 or >95 respectively.



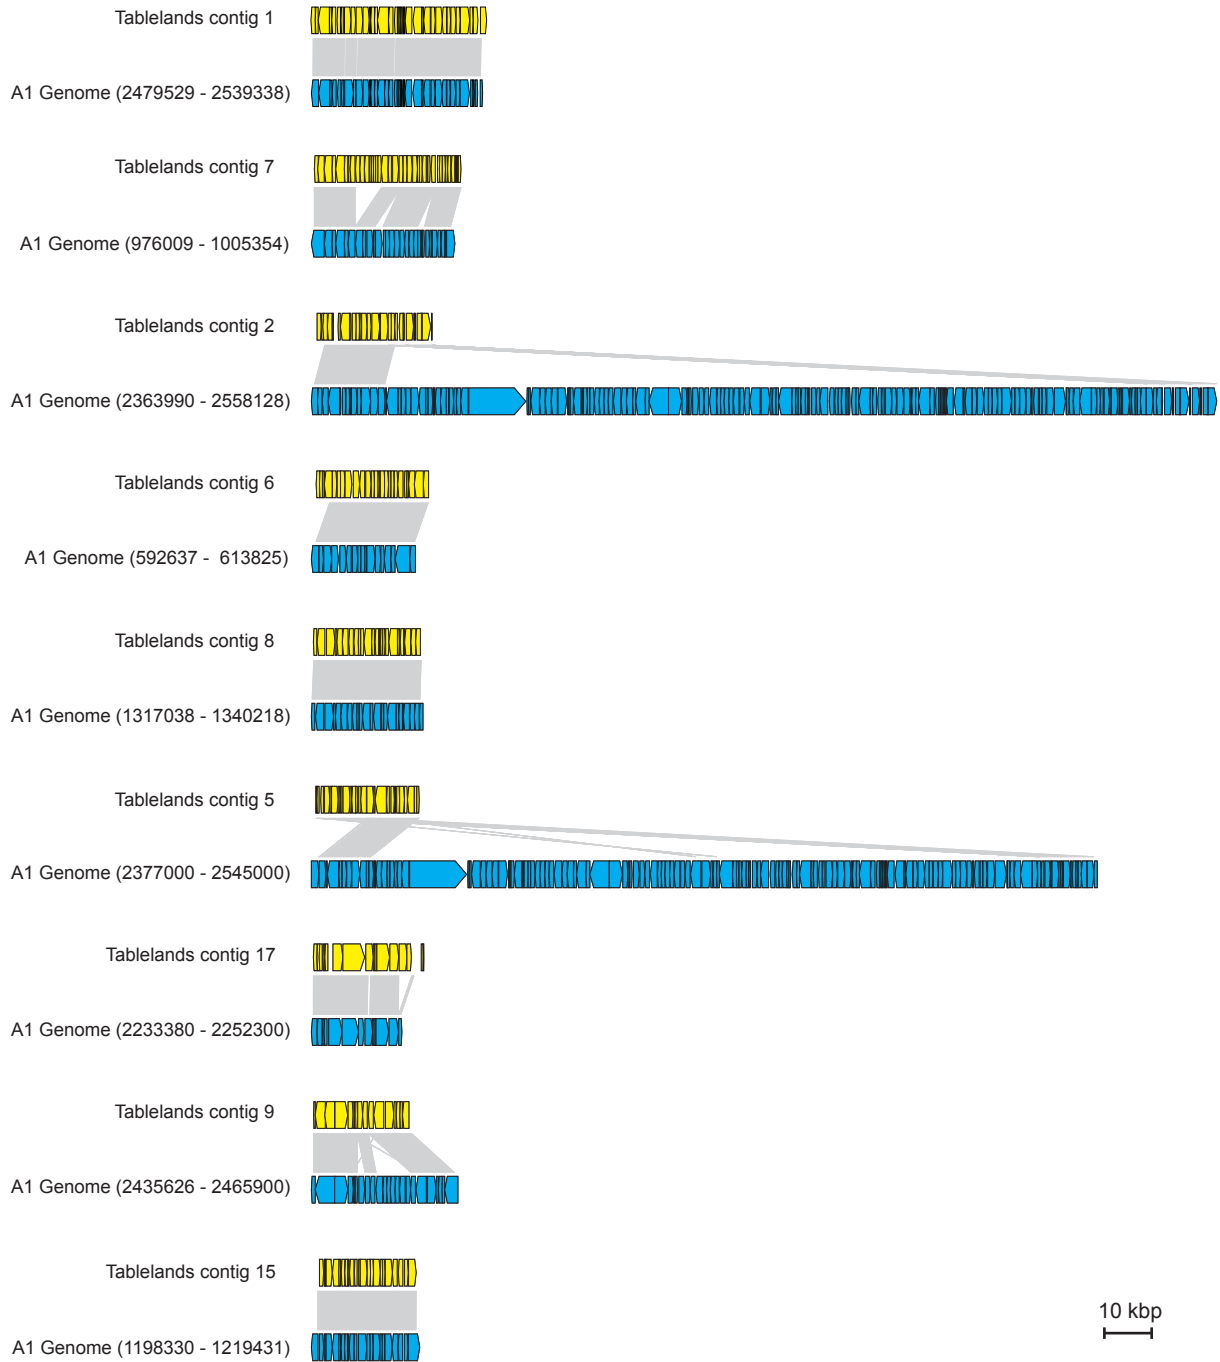

Supplementary Figure 9 Blastn comparisons of the long contigs from the Tablelands<sup>1</sup> (yellow) with the genome sequence of strain A1 (Blue)

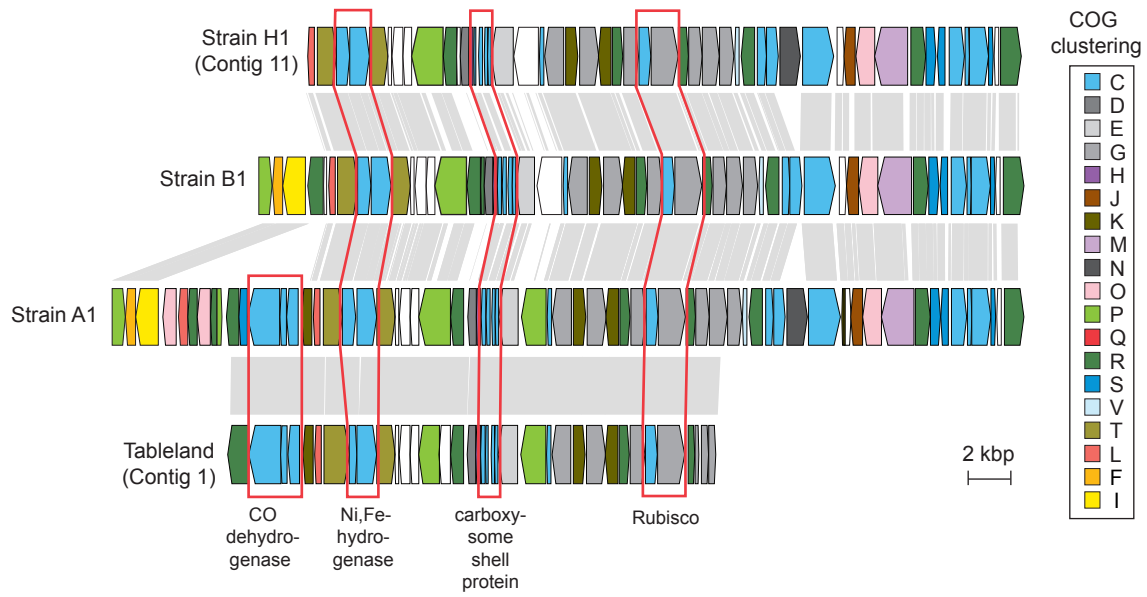

Supplementary Figure 10 Comparisons of predicted gene clusters encoding carbon fixation related proteins



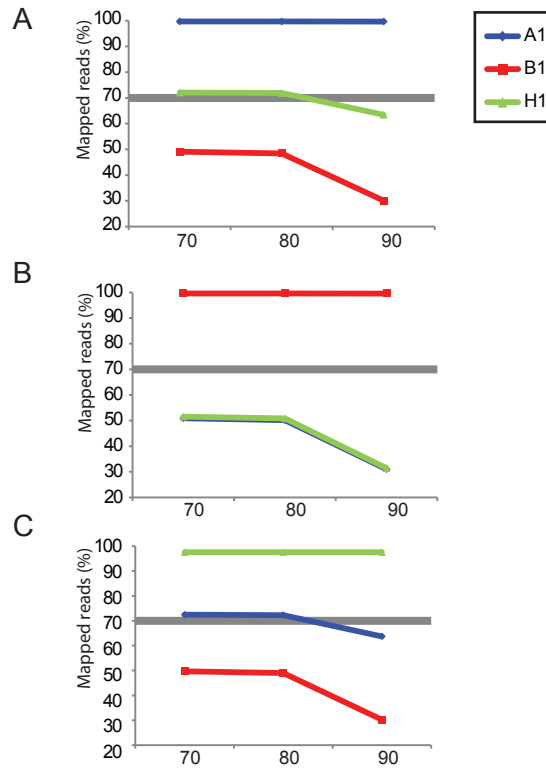

Supplementary Figure 12 Mapped percent of raw reads to each genome. Raw reads from strain A1, B1 and H1 with average read length ~100 bp were mapped to the (draft) genome sequences of strains A1 (A), B1 (B) and H1 (C). The length cut off is 95 %. The numbers shown in the bottom of each graph indicate the similarity cut-off value (e.g. 70 means 70% similarity in 95% length.).



Supplementary Table 1 Geochemical properties of the studied terrestrial serpentinizing sites and other alkaline soil or ground water

| Component                                  | Present*   |       |          |        |                   |                   |                   |                 |              |                     |        |               |            | Absent*        |             |           |          |         |                 |            |                |           |   |           |
|--------------------------------------------|------------|-------|----------|--------|-------------------|-------------------|-------------------|-----------------|--------------|---------------------|--------|---------------|------------|----------------|-------------|-----------|----------|---------|-----------------|------------|----------------|-----------|---|-----------|
|                                            | USA        |       | Portugal | Canada | Finland           |                   | Japan             | USA             | South Africa | USA                 | Norway | Mid-Atlantic  | The Cedars |                | Portugal    | Canada    | Finland  | Japan   | USA             | Norway     | Mid-Atlantic   |           |   |           |
|                                            | BS1        | BS5   | AC3      | WHC2b  | 100 m deep        | 1000 m deep       | 1500 m deep       | MIU (Sep, 2005) | LC4          | Evander, EV818 DRLW | GPS1   | Gw3           | 30° N°     | Cabego de Vide | Table lands | Outokumpu | Mizunami | Chicago | Kalahari Shield | The Cedars | Lake Ophiolite | Lost City |   |           |
| pH                                         | 11.5       | 11.6  | 11.4     | 12.3   | -                 | 8-9               | 38                | 8.2             | 12.5         | 8.0                 | 11.9   | 8.8           | 9-9.8      | -              | -           | -         | -        | -       | -               | -          | -              | -         | - | -         |
| E <sub>h</sub> (mV)                        | -250       | -550  | -383     | -552   | -                 | -                 | -                 | -308            | -45          | -                   | -656   | -             | -          | -              | -           | -         | -        | -       | -               | -          | -              | -         | - | -         |
| DO (mM)                                    | <dl        | <dl   | <dl      | -      | -                 | -                 | -                 | -               | <0.12        | <dl                 | <dl    | -             | -          | -              | -           | -         | -        | -       | -               | -          | -              | -         | - | -         |
| N <sub>2</sub> (% by vol)                  | 49.6       | 53.6  | -        | -      | 33                | 40                | 38                | -               | -            | -                   | 36.6   | -             | -          | -              | -           | -         | -        | -       | -               | -          | -              | -         | - | -         |
| H <sub>2</sub> (% by vol)                  | 39.2       | 34    | -        | -      | 0.024             | <0.003            | 0.02              | -               | -            | -                   | 50.9   | -             | -          | -              | -           | -         | -        | -       | -               | -          | -              | -         | - | -         |
| CH <sub>4</sub> (% by vol)                 | 6.5        | 5.3   | -        | -      | 58                | 49                | 48                | -               | -            | -                   | 7.4    | -             | -          | -              | -           | -         | -        | -       | -               | -          | -              | -         | - | -         |
| N <sub>2</sub> (aq) mM                     | -          | -     | -        | -      | -                 | -                 | -                 | -               | -            | -                   | -      | -             | -          | -              | -           | -         | -        | -       | -               | -          | -              | -         | - | -         |
| H <sub>2</sub> (aq) mM                     | -          | -     | -        | 1.04   | -                 | -                 | -                 | -               | -            | -                   | -      | -             | -          | -              | -           | -         | -        | -       | -               | -          | -              | -         | - | 0.25-0.43 |
| CH <sub>2</sub> (aq) mM                    | -          | -     | -        | 0.02   | -                 | -                 | -                 | -               | -            | -                   | -      | -             | -          | -              | -           | -         | -        | -       | -               | -          | -              | -         | - | 0.13-0.28 |
| Na <sup>+</sup> (mM)                       | 2.0        | 1.98  | 2.26     | -      | 57.42             | 76.56             | 57.85             | 22.7            | 2.2          | 18.90               | 14.69  | 0.54          | 479-485    | -              | -           | -         | -        | -       | -               | -          | -              | -         | - | -         |
| K <sup>+</sup> (mM)                        | 0.038      | 0.03  | 0.12     | -      | 0.76              | 0.59              | 1.64              | 0.041           | 1.2          | -                   | 0.13   | 0.012         | -          | -              | -           | -         | -        | -       | -               | -          | -              | -         | - | -         |
| Ca <sup>2+</sup> (mM)                      | -          | 1.17  | 0.58     | 1.12   | 38.29             | 55.55             | 65.81             | 17.2            | 27           | 13.70               | 0.94   | 0.031         | 21.0-23.3  | -              | -           | -         | -        | -       | -               | -          | -              | -         | - | -         |
| Mg <sup>2+</sup> (mM)                      | -          | 0.036 | <dl      | 0.03   | 0.77              | 0.71              | 3.79              | 0.07            | <0.001       | -                   | 0.004  | 0.42          | 9-19       | -              | -           | -         | -        | -       | -               | -          | -              | -         | - | -         |
| PO <sub>4</sub> <sup>3-</sup> (mM)         | <dl        | <dl   | -        | -      | -                 | -                 | -                 | <0.105          | -            | -                   | <dl    | 0.00063       | -          | -              | -           | -         | -        | -       | -               | -          | -              | -         | - | -         |
| HCO <sub>3</sub> <sup>-</sup> (mM)         | <dl        | <dl   | -        | -      | -                 | -                 | -                 | -               | -            | -                   | <dl    | -             | -          | -              | -           | -         | -        | -       | -               | -          | -              | -         | - | -         |
| Cl <sup>-</sup> (mM)                       | 1.7        | 1.49  | 1.48     | 9.59   | 128.34            | 184.75            | 198.57            | 52.6            | 2.1          | 40.00               | 8.73   | 0.54          | 546-549    | -              | -           | -         | -        | -       | -               | -          | -              | -         | - | -         |
| NO <sub>3</sub> <sup>-</sup> (mM)          | <dl        | <dl   | <dl      | -      | -                 | -                 | -                 | <0.005          | -            | 0.56                | <dl    | 0.019         | -          | -              | -           | -         | -        | -       | -               | -          | -              | -         | - | -         |
| SO <sub>4</sub> <sup>2-</sup> (mM)         | <dl        | 0.001 | 0.03     | -      | 1.58 <sup>§</sup> | 1.67 <sup>§</sup> | 1.65 <sup>§</sup> | 0.014           | 0.055        | 3.08                | <dl    | 0.038         | 5.9-12.9   | -              | -           | -         | -        | -       | -               | -          | -              | -         | - | -         |
| TIC (mM)                                   | -          | 0.07  | 0.11     | 0.37   | -                 | -                 | -                 | -               | -            | 0.275 (DIC)         | 0.035  | 0.792 (DIC)   | -          | -              | -           | -         | -        | -       | -               | -          | -              | -         | - | -         |
| DOC (mM)                                   | -          | 0.02  | -        | 0.08   | -                 | -                 | -                 | 0.13            | -            | -                   | 0.17   | 0.00135 (TOC) | -          | -              | -           | -         | -        | -       | -               | -          | -              | -         | - | -         |
| Ca/Na ratio occurrence of serpentinization | NA         | 0.59  | 0.26     | NA     | 0.67              | 0.73              | 1.14              | 0.76            | 12.27        | 0.72                | 0.06   | 0.06          | -0.05      | -              | -           | -         | -        | -       | -               | -          | -              | -         | - | -         |
| Reference                                  | This study | 3, 4  | 5, 6     | 7      | 8                 | 8                 | 8                 | 9               | 10           | 11                  | 3, 4   | 12            | 13         | -              | -           | -         | -        | -       | -               | -          | -              | -         | - | -         |

-, not available, <dl; below the detection limit; \* Alkaline environments where strains A1, B1 and H1 related phylotypes are present or absent, §Total S concentration

Supplementary Table 2 Percent similarities of 16S rRNA gene sequence between strains A1, B1 and H1, and type strains in the three closest genera

|                                                     | 1     | 2     | 3     | 4     | 5     | 6   |
|-----------------------------------------------------|-------|-------|-------|-------|-------|-----|
| Strain A1                                           | 100   | -     | -     | -     | -     | -   |
| Strain B1                                           | 97.7  | 100   | -     | -     | -     | -   |
| Strain H1                                           | 98.95 | 98.75 | 100   | -     | -     | -   |
| <i>Malikia granosa</i> DSM 15619 <sup>T</sup>       | 95.56 | 96.51 | 96.58 | 100   | -     | -   |
| <i>Hydrogenophaga flava</i> DSM 619 <sup>T</sup>    | 94.96 | 96.12 | 95.98 | 96.64 | 100   | -   |
| <i>Macromonas bipunctata</i> IAM 14880 <sup>T</sup> | 94.07 | 94.72 | 94.65 | 96.5  | 95.61 | 100 |

Supplementary Table 3 Substrate utilization for strains A1, B1 and H1

|                                                  |             | A1                       | B1  | H1  |
|--------------------------------------------------|-------------|--------------------------|-----|-----|
| <b>Autotrophic growth</b>                        |             |                          |     |     |
| <b>Electron donor and Carbon source</b>          |             | <b>Electron Acceptor</b> |     |     |
| H <sub>2</sub> + CaCO <sub>3</sub>               | Oxygen      | ++                       | -   | ++  |
| H <sub>2</sub> + CaCO <sub>3</sub>               | Thiosulfate | -                        | NT  | NT  |
| H <sub>2</sub> + CaCO <sub>3</sub>               | Nitrate     | NT                       | -   | ++  |
| Thiosulfate + CaCO <sub>3</sub>                  | Oxygen      | ++                       | -   | NT  |
| <b>Heterotrophic growth</b>                      |             |                          |     |     |
| <b>Electron donor and carbon source</b>          |             | <b>Electron Acceptor</b> |     |     |
| Formate + CaCO <sub>3</sub>                      | Oxygen      | +                        | +   | +   |
| Acetate + CaCO <sub>3</sub>                      | Oxygen      | +                        | +++ | ++  |
| Propionate + CaCO <sub>3</sub>                   | Oxygen      | -                        | -   | NT  |
| Butyrate + CaCO <sub>3</sub>                     | Oxygen      | +                        | +++ | +   |
| Lactate + CaCO <sub>3</sub>                      | Oxygen      | +                        | +++ | ++  |
| Pyruvate + CaCO <sub>3</sub>                     | Oxygen      | +                        | +++ | NT  |
| Glucose + CaCO <sub>3</sub>                      | Oxygen      | -                        | +++ | ++  |
| Glutamate + CaCO <sub>3</sub>                    | Oxygen      | -                        | -   | NT  |
| Glycerol + CaCO <sub>3</sub>                     | Oxygen      | -                        | -   | NT  |
| Cyclohexane + CaCO <sub>3</sub>                  | Oxygen      | +                        | ±   | -   |
| <b>Electron donor and/or carbon source</b>       |             |                          |     |     |
| Formate + H <sub>2</sub> + CaCO <sub>3</sub>     | Oxygen      | ++                       | +   | ++  |
| Acetate + H <sub>2</sub> + CaCO <sub>3</sub>     | Oxygen      | +++                      | +++ | +++ |
| Butyrate + H <sub>2</sub> + CaCO <sub>3</sub>    | Oxygen      | +++                      | +++ | +   |
| Lactate + H <sub>2</sub> + CaCO <sub>3</sub>     | Oxygen      | +++                      | +++ | +++ |
| Pyruvate + H <sub>2</sub> + CaCO <sub>3</sub>    | Oxygen      | +++                      | +++ | NT  |
| Glucose + H <sub>2</sub> + CaCO <sub>3</sub>     | Oxygen      | +                        | +++ | +++ |
| Cyclohexane + H <sub>2</sub> + CaCO <sub>3</sub> | Oxygen      | +++                      | ±   | -   |
| <b>Electron Acceptor</b>                         |             |                          |     |     |
| Acetate + H <sub>2</sub> + CaCO <sub>3</sub>     | Oxygen      | +++                      | +++ | +++ |
| Acetate + H <sub>2</sub> + CaCO <sub>3</sub>     | Nitrate     | -                        | +++ | +++ |
| Acetate + H <sub>2</sub> + CaCO <sub>3</sub>     | Sulfate     | -                        | -   | -   |
| Acetate + H <sub>2</sub> + CaCO <sub>3</sub>     | Thiosulfate | +++                      | -   | -   |
| Acetate + H <sub>2</sub> + CaCO <sub>3</sub>     | Fumarate    | -                        | -   | -   |
| Acetate + H <sub>2</sub> + CaCO <sub>3</sub>     | Iron        | -                        | -   | -   |
| <b>Fermentation</b>                              |             |                          |     |     |
| Glucose                                          |             | -                        | +++ | +++ |
| Cyclohexane                                      |             | -                        | -   | NT  |

+; positive, - Negative, NT; not tested

Supplementary Table 4 Statistics for assembled genomes of strains A1, B1 and H1

| Sample | Word Length | Contig Count* | Contig Count Over_1kbp | N50 Length | Max Contig | Total Contig Length | Total Reads | Reads assembled |
|--------|-------------|---------------|------------------------|------------|------------|---------------------|-------------|-----------------|
| A1     | 53          | 36            | 25                     | 226,682    | 471,724    | 2,561,383           | 3,857,324   | 3,829,752       |
| B1     | 53          | 22            | 20                     | 267,175    | 516,238    | 2,611,506           | 4,385,866   | 4,346,338       |
| H1     | 53          | 96            | 70                     | 87,939     | 198,940    | 2,511,299           | 4,927,302   | 4,836,043       |

\*Length cut off > 300 bp



Supplementary Table 5 Primer sequences for the qPCR analyses

| Targeted Genes | Forward (5' - 3')     | Reverse (5' - 3')    |
|----------------|-----------------------|----------------------|
| SRAA-0853      | CGTCGCCAACTGGTTCTT    | CCGTACCACCACTGAATCA  |
| SRAA-747       | CCGAGCACAAGACCTACA    | GAATGGGCACCGAGATGTT  |
| SRAA-1136      | CCACCACGCAGAACAAATCAA | CAGCTCAAACAGGGGTCGTA |
| SRAA-2301      | CGCCTTTTTGGAGCAGCA    | GAGGAAAAAGCGCAGGTC   |
| SRAA-2294      | CCCGCATCAAGAAGATCAAC  | GGCATCCAGTGCAGCTTTA  |
| SRAA-2317      | AGCGCCGGTGTCAAAGAATA  | GTGTCGAGCGGGATGTAA   |

## Supplementary References

1. Brazelton, W. J., Nelson, B. & Schrenk, M. O. Metagenomic evidence for H<sub>2</sub> oxidation and H<sub>2</sub> production by serpentinite-hosted subsurface microbial communities. *Front Microbiol* **2**, 268, (2012).
2. Mulkidjanian, A. Y., Galperin, M. Y., Makarova, K. S., Wolf, Y. I. & Koonin, E. V. Evolutionary primacy of sodium bioenergetics. *Biol Direct* **3**, 13 (2008).
3. Morrill, P. L. *et al.* Geochemistry and geobiology of a present-day serpentinization site in California: The Cedars. *Geochimica Et Cosmochimica Acta* **109**, 222-240 (2013).
4. Suzuki, S. *et al.* Microbial diversity in The Cedars, an ultrabasic, ultrareducing, and low salinity serpentinizing ecosystem. *Proc Natl Acad Sci U S A* **110**, 15336-15341 (2013).
5. Marques, J. M. *et al.* Origins of high pH mineral waters from ultramafic rocks, Central Portugal. *Applied Geochemistry* **23**, 3278-3289 (2008).
6. Tiago, I. & Verissimo, A. Microbial and functional diversity of a subterrestrial high pH groundwater associated to serpentinization. *Environmental Microbiology* **15**, 1687-1706 (2013).
7. Szponar, N. *et al.* Geochemistry of a continental site of serpentinization, the Tablelands Ophiolite, Gros Morne National Park: A Mars analogue. *Icarus* **224**, 286-296 (2013).
8. Itavaara, M. *et al.* Characterization of bacterial diversity to a depth of 1500 m in the Outokumpu deep borehole, Fennoscandian Shield. *FEMS Microbiology Ecology* **77**, 295-309 (2011).
9. Fukuda, A. *et al.* Geomicrobiological properties of ultra-deep granitic groundwater from the Mizunami Underground Research Laboratory (MIU), central Japan. *Microb Ecol* **60**, 214-225 (2010).
10. Roadcap, G. S., Sanford, R. A., Jin, Q. S., Pardinas, J. R. & Bethke, C. M. Extremely alkaline (pH > 12) ground water hosts diverse microbial community. *Ground Water* **44**, 511-517 (2006).
11. Davidson, M. M. *et al.* Capture of Planktonic Microbial Diversity in Fractures by Long-Term Monitoring of Flowing Boreholes, Evander Basin, South Africa. *Geomicrobiology Journal* **28**, 275-300 (2011).
12. Daae, F. L. *et al.* Microbial life associated with low-temperature alteration of ultramafic rocks in the Leka ophiolite complex. *Geobiology* **11**, 318-339 (2013).
13. Kelley, D. S. *et al.* An off-axis hydrothermal vent field near the Mid-Atlantic Ridge at 30 degrees N. *Nature* **412**, 145-149 (2001).
